# Supplementary material for: Changes in cannabis policy and prevalence of recreational cannabis use among adolescents and young adults in Europe—An interrupted time-series analysis
Source: PubMed Central journal article supplement (PMC8754285; doi:10.1371/journal.pone.0261885), 2022-01-12
Supplement: pone.0261885.s003.pdf [file pone.0261885.s003.pdf]

```

name: <unnamed>
log: /Users/nicors/OneDrive - KI.SE/Mac/Research/alexander/analysis_ca
> nnabis_8jun21.smcl
log type: smcl
opened on: 8 Jun 2021, 13:03:18

```

```

1 . use http://www.stats4life.se/data/cannabis.dta, clear
2 . *bysort id (year): gen tag = cond(_n==_N, 1, 0)
3 .
4 . * Average trend among those countries (Germany, Netherlands, Slovakia, Swede
> n) + (Belgium, Norway, Portugal, Spain)
5 .
6 . mixed sp year || country: year if inlist(country, "Czechia", "Italy", "UK")
> != 1, reml cov(unstructured) nolog

```

```

Mixed-effects REML regression
Group variable: country
Number of obs      =      67
Number of groups   =       8
Obs per group:
    min =         4
    avg =        8.4
    max =        15
Wald chi2(1)      =       3.20
Prob > chi2       =       0.0736
Log restricted-likelihood = -124.51436

```

| sp    | Coefficient | Std. err. | z     | P> z  | [95% conf. interval] |          |
|-------|-------------|-----------|-------|-------|----------------------|----------|
| year  | .0797562    | .0445748  | 1.79  | 0.074 | -.0076087            | .1671212 |
| _cons | -154.3555   | 88.81216  | -1.74 | 0.082 | -328.4242            | 19.7131  |

| Random-effects parameters    | Estimate  | Std. err. | [95% conf. interval] |          |
|------------------------------|-----------|-----------|----------------------|----------|
| <b>country:</b> Unstructured |           |           |                      |          |
| var(year)                    | .0107887  | .0079683  | .0025368             | .0458826 |
| var(_cons)                   | 42523.75  | 31633.46  | 9895.14              | 182743.2 |
| cov(year,_cons)              | -21.41778 | 15.87602  | -52.5342             | 9.698647 |
| var(Residual)                | 1.329559  | .2606739  | .9053591             | 1.952516 |

```

LR test vs. linear model: chi2(3) = 123.05      Prob > chi2 = 0.0000

```

Note: LR test is conservative and provided only for reference.

```
7 . lincom year, cformat(%3.2f)
```

```
( 1) [sp]year = 0
```

| sp  | Coefficient | Std. err.   | z           | P> z         | [95% conf. interval] |             |
|-----|-------------|-------------|-------------|--------------|----------------------|-------------|
| (1) | <b>0.08</b> | <b>0.04</b> | <b>1.79</b> | <b>0.074</b> | <b>-0.01</b>         | <b>0.17</b> |

```
8 .
9 . * Figure 1
10 .
11 . levelsof country , local(lc)
    ` "Belgium" ` ` "Czechia" ` ` "Germany" ` ` "Italy" ` ` "Netherlands" ` ` "Norway" ` ` "Por
    > tugal" ` ` "Slovakia" ` ` "Spain" ` ` "Sweden" ` ` "UK" `
12 .
13 . qui foreach c of local lc {
14 .
15 . graph combine `listplot'
16 . graph export "/Users/nicors/OneDrive - KI.SE/Mac/Research/alexander/figure1.
    > jpg", as(jpg) name("Graph") quality(100) replace
    file /Users/nicors/OneDrive - KI.SE/Mac/Research/alexander/figure1.jpg saved
    as JPG format
17 . graph close _all
18 .
19 . * Table 1 A) Implementation of more lenient legislation
20 .
21 . keep if inlist(country, "Czechia", "Italy", "UK")== 1
    (67 observations deleted)
22 .
```

```

23 . capture drop yfi yfi_plus
24 . gen yfi = year - 2013 if country == "Czechia" & inrange(year, 2010, 2017)
    (29 missing values generated)
25 . replace yfi = year - 2014 if country == "Italy" & inrange(year, 2007, 2017)
    (4 real changes made)
26 . replace yfi = year - 2004 if country == "UK" & inrange(year, 1994, 2008)
    (12 real changes made)
27 .
28 . gen yfi_plus = (yfi>0)*(yfi-0) if yfi != .
    (13 missing values generated)
29 .
30 . mixed sp yfi yfi_plus || country : yfi yfi_plus , reml nolog

```

```

Mixed-effects REML regression          Number of obs    =      24
Group variable: country              Number of groups =       3
                                         Obs per group:
                                         min =          4
                                         avg =          8.0
                                         max =          12
                                         Wald chi2(2)    =       0.19
Log restricted-likelihood = -49.870326 Prob > chi2      =       0.9076

```

| sp       | Coefficient | Std. err. | z     | P> z  | [95% conf. interval] |          |
|----------|-------------|-----------|-------|-------|----------------------|----------|
| yfi      | .0303394    | .1489911  | 0.20  | 0.839 | -.2616778            | .3223567 |
| yfi_plus | -.248681    | .5654956  | -0.44 | 0.660 | -1.357032            | .85967   |
| _cons    | 9.426256    | 1.19018   | 7.92  | 0.000 | 7.093545             | 11.75897 |

| Random-effects parameters   | Estimate | Std. err. | [95% conf. interval] |          |
|-----------------------------|----------|-----------|----------------------|----------|
| <b>country:</b> Independent |          |           |                      |          |
| var(yfi)                    | 4.47e-10 | 1.09e-08  | 6.58e-31             | 3.04e+11 |
| var(yfi_plus)               | .501902  | .7880028  | .0231315             | 10.89014 |
| var(_cons)                  | 3.146698 | 3.670072  | .3199469             | 30.94798 |
| var(Residual)               | 2.773069 | .9736205  | 1.393494             | 5.51844  |

LR test vs. linear model: chi2(3) = 5.71 Prob > chi2 = 0.1267

Note: LR test is conservative and provided only for reference.

```
31 .
32 . lincom yfi, cformat(%3.2f)
```

```
( 1) [sp]yfi = 0
```

| sp  | Coefficient | Std. err.   | z           | P> z         | [95% conf. interval] |             |
|-----|-------------|-------------|-------------|--------------|----------------------|-------------|
| (1) | <b>0.03</b> | <b>0.15</b> | <b>0.20</b> | <b>0.839</b> | <b>-0.26</b>         | <b>0.32</b> |

```
33 . lincom yfi + yfi_plus, cformat(%3.2f)
```

```
( 1) [sp]yfi + [sp]yfi_plus = 0
```

| sp  | Coefficient  | Std. err.   | z            | P> z         | [95% conf. interval] |             |
|-----|--------------|-------------|--------------|--------------|----------------------|-------------|
| (1) | <b>-0.22</b> | <b>0.51</b> | <b>-0.43</b> | <b>0.667</b> | <b>-1.21</b>         | <b>0.77</b> |

```
34 . capture drop av_fit c_fit b*
```

```
35 . predictnl av_fit = predict() , ci(lo hi)
(13 missing values generated)
note: confidence intervals calculated using Z critical values.
```

```
36 . predict c_fit , fitted
(13 missing values generated)
```

```
37 . predict b*, reffects relelevel(country)
```

```
38 .
39 . * Country-specific BLUP based on the model
40 .
41 . levelsof country , local(lc)
`"Czechia"' ` "Italy"' ` "UK"'
```

```

42 . foreach c of local lc {
    2.     qui su b1 if country == "`c'"
    3.     scalar blup_b1 = r(mean)
    4.     qui su b2 if country == "`c'"
    5.     scalar blup_b2 = r(mean)
    6.     noi di _n "`c'"
    7.     display "Trend before/after = " %3.2f [(_b[yfi]+blup_b1)]*1 _c
> ///
>     " " %3.2f [(_b[yfi]+blup_b1) + (_b[yfi_plus]+blup_b2)]*1
    8. }

Czechia
Trend before/after = 0.03 -0.25
Italy
Trend before/after = 0.03 0.39
UK
Trend before/after = 0.03 -0.79
43 .
44 . twoway (scatter sp yfi if country == "Czechia", mc(red%10) msize(small)) /
> //
>         (scatter sp yfi if country == "Italy", mc(green%10) msize(
> small)) ///
>         (scatter sp yfi if country == "UK", mc(blue%10) msize(smal
> l)) ///
>         (rarea lo hi yfi, fc(gs10%20) lc(gs10%20) sort ) ///
>         (line av_fit yfi, sort lc(black%80) lw(thick)) ///
>         (line c_fit yfi if country == "Czechia", lc(red%30) sort) /
> //
>         (line c_fit yfi if country == "Italy", lc(green%30) sort) /
> //
>         (line c_fit yfi if country == "UK", lc(blue%30) sort) ///
>         , legend(label(1 "Czechia") label(2 "Italy") label(3 "UK") r
> egion(style(none)) order(1 2 3) ring(1) pos(4) col(1)) ///
>         ytitle("Self-reported cannabis use (%)") ///
>         ylabel(4(2)16, angle(horiz)) xline(0, lp(dash) lc(grey%50))
> xlabel(-10(1)4) ///
>         xtitle("Years from intervention") ///
>         plotregion(style(none)) ///
>         title("A) Implementation of more lenient legislation") ///
>         name(figure1A, replace)
(note: named style grey not found in class color, default attributes used)

```

```

45 .
46 . graph export figure1A.pdf, as(pdf) replace
    file /Users/nicors/OneDrive - KI.SE/Mac/Research/alexander/figure1A.pdf
    saved as PDF format

47 .
48 . * Table 1. B) Implementation of stricter legislation
49 .
50 . capture drop yfi yfi_plus

51 . gen yfi = year - 2009 if country == "Czechia" & inrange(year, 2004, 2012)
    (31 missing values generated)

52 . replace yfi = year - 2006 if country == "Italy" & inrange(year, 2001, 2013)
    (5 real changes made)

53 . replace yfi = year - 2009 if country == "UK" & inrange(year, 2005, 2017)
    (11 real changes made)

54 .
55 . gen yfi_plus = (yfi>0)*(yfi-0) if yfi != .
    (15 missing values generated)

56 .
57 . mixed sp yfi yfi_plus || country : yfi yfi_plus , reml nolog

```

```

Mixed-effects REML regression                Number of obs    =        22
Group variable: country                   Number of groups =         3
                                           Obs per group:
                                           min =          5
                                           avg =          7.3
                                           max =          11
                                           Wald chi2(2)    =         3.87
Log restricted-likelihood = -47.145137     Prob > chi2     =         0.1446

```

| sp       | Coefficient | Std. err. | z     | P> z  | [95% conf. interval] |          |
|----------|-------------|-----------|-------|-------|----------------------|----------|
| yfi      | .0078687    | .3137429  | 0.03  | 0.980 | -.6070561            | .6227934 |
| yfi_plus | -.4459111   | .4594528  | -0.97 | 0.332 | -1.346422            | .4545998 |
| _cons    | 9.049132    | .8752353  | 10.34 | 0.000 | 7.333703             | 10.76456 |

| Random-effects parameters   | Estimate | Std. err. | [95% conf. interval] |          |
|-----------------------------|----------|-----------|----------------------|----------|
| <b>country:</b> Independent |          |           |                      |          |
| var(yfi)                    | .0201629 | .0927441  | 2.45e-06             | 165.9063 |
| var(yfi_plus)               | 1.58e-12 | 8.55e-09  | 0                    | .        |
| var(_cons)                  | .4785073 | 1.088806  | .0055341             | 41.37443 |
| var(Residual)               | 4.111024 | 1.482871  | 2.027293             | 8.336496 |

LR test vs. linear model:  $\chi^2(3) = 0.42$  Prob >  $\chi^2 = 0.9352$

Note: LR test is conservative and provided only for reference.

58 .

59 . lincom yfi, cformat(%3.2f)

( 1) [sp]yfi = 0

| sp  | Coefficient | Std. err. | z    | P> z  | [95% conf. interval] |      |
|-----|-------------|-----------|------|-------|----------------------|------|
| (1) | 0.01        | 0.31      | 0.03 | 0.980 | -0.61                | 0.62 |

60 . lincom yfi + yfi\_plus, cformat(%3.2f)

( 1) [sp]yfi + [sp]yfi\_plus = 0

| sp  | Coefficient | Std. err. | z     | P> z  | [95% conf. interval] |      |
|-----|-------------|-----------|-------|-------|----------------------|------|
| (1) | -0.44       | 0.24      | -1.83 | 0.067 | -0.91                | 0.03 |

61 . capture drop av\_fit c\_fit b\*

```

62 . capture drop lo hi

63 . predictnl av_fit = predict() , ci(lo hi)
    (15 missing values generated)
    note: confidence intervals calculated using Z critical values.

64 . predict c_fit , fitted
    (15 missing values generated)

65 . predict b*, reffects relevel(country)

66 .
67 . * Country-specific BLUP based on the model
68 .
69 . levelsof country , local(lc)
    `Czechia' `Italy' `UK'

70 . foreach c of local lc {
    2.     qui su b1 if country == "`c'"
    3.     scalar blup_b1 = r(mean)
    4.     qui su b2 if country == "`c'"
    5.     scalar blup_b2 = r(mean)
    6.     noi di _n "`c'"
    7.     display "Trend before/after = " %3.2f [(_b[yfi]+blup_b1)]*1 _c
    > ///
    >     " " %3.2f [(_b[yfi]+blup_b1) + (_b[yfi_plus]+blup_b2)]*1
    8. }

Czechia
Trend before/after = -0.04 -0.49
Italy
Trend before/after = 0.08 -0.36
UK
Trend before/after = -0.02 -0.46

71 .
72 . twoway (scatter sp yfi if country == "Czechia", mc(red%10) msize(small)) /
    > //
    >     (scatter sp yfi if country == "Italy", mc(green%10) msize(
    > small)) ///
    >     (scatter sp yfi if country == "UK", mc(blue%10) msize(smal
    > l)) ///
    >     (rarea lo hi yfi, fc(gs10%20) lc(gs10%20) sort ) ///
    >     (line av_fit yfi, sort lw(thick) lc(black%80)) ///
    >     (line c_fit yfi if country == "Czechia", lc(red%30) sort) /
    > //
    >     (line c_fit yfi if country == "Italy", lc(green%30) sort) /
    > //
    >     (line c_fit yfi if country == "UK", lc(blue%30) sort) ///
    >     , legend(label(1 "Czechia") label(2 "Italy")) ///

```



```
> label(3 "UK") region(style(none)) order(1 2 3) ring(1) pos(
> 4) col(1)) ///
> ytitle("Self-reported cannabis use (%)") ///
> ylabel(4(2)16, angle(horiz)) xline(0, lp(dash) lc(grey%50))
> xlabel(-5(1)8) ///
> xtitle("Years from intervention") ///
> title("B) Implementation of more stricter legislation") ///
> plotregion(style(none)) ///
> name(figure1B, replace)
(note: named style grey not found in class color, default attributes used)
```

73 .

```
74 . graph export figure1B.pdf, as(pdf) replace
file /Users/nicors/OneDrive - KI.SE/Mac/Research/alexander/figure1B.pdf
saved as PDF format
```

75 .

```
76 . log close
name: <unnamed>
log: /Users/nicors/OneDrive - KI.SE/Mac/Research/alexander/analysis_ca
> nnabis_8jun21.smcl
log type: smcl
closed on: 8 Jun 2021, 13:04:13
```

---
